# Supplementary material for: Understanding the adsorptive interactions of arsenate–iron nanoparticles with curved fullerene-like sheets in activated carbon using a quantum mechanics/molecular mechanics computational approach
Source: Royal Society of Chemistry journal article supplement (doi:10.1039/c7cp02006f), 2017-01-01
Supplement: c7cp02006f2.pdf [file c7cp02006f2.pdf]

## Electronic Supplementary Information

# Understanding the adsorptive interactions of arsenate—iron nanoparticles with curved fullerene-like sheets in activated carbon using a quantum mechanics/molecular mechanics computational approach

Nguyen Ngoc Ha, <sup>a,b,\*</sup> Le Minh Cam, <sup>b,\*</sup> Nguyen Thi Thu Ha, <sup>b</sup> Bee-Min Goh <sup>c</sup>, Martin Saunders, <sup>d</sup> Zhong-Tao Jiang, <sup>e</sup> Mohammednoor Altarawneh, <sup>f</sup> Bogdan Dlugogorski, <sup>f</sup> Mohanad El-Harbawi, <sup>g</sup> Chun-Yang Yin, <sup>a,h\*</sup>

<sup>a</sup> *School of Science and Engineering, Teesside University, Borough Road, Middlesbrough, TS1 3BA, United Kingdom*

<sup>b</sup> *Department of Physical Chemistry, Faculty of Chemistry Hanoi, National University of Education Hanoi Vietnam.*

<sup>c</sup> *School of Chemical Engineering and Advanced Materials, Newcastle University, NE1 7RU, United Kingdom*

<sup>d</sup> *Centre for Microscopy, Characterisation and Analysis (CMCA), The University of Western Australia (M010), 35 Stirling Highway, Crawley WA 6009, Australia*

<sup>e</sup> *Surface Analysis and Materials Engineering Research Group, School of Engineering & Information Technology, Murdoch University, Murdoch, Western Australia 6150, Australia*

<sup>f</sup> *School of Engineering & Information Technology, Murdoch University, Murdoch, Western Australia 6150, Australia*

<sup>g</sup> *Chemical Engineering Department, King Saud University, Riyadh 11421, Saudi Arabia*

\*Corresponding Authors: Tel.: +65 6908 6022. Email: [chunyang.yin@ncl.ac.uk](mailto:chunyang.yin@ncl.ac.uk) (C.-Y.Y.); [hann@hnue.edu.vn](mailto:hann@hnue.edu.vn) (N.N.H.); [camlm@hnue.edu.vn](mailto:camlm@hnue.edu.vn) (L.M.C.)

<sup>h</sup> *Newcastle University Singapore, 537 Clementi Road #06-01, SIT Building @ Ngee Ann Polytechnic, Singapore, 599493. This is the present address/affiliation for C.Y. Yin.*

Table S1. Textural characteristics of AC based on the N<sub>2</sub> adsorption isotherms determined at 77K.

| Specific surface area (m <sup>2</sup> g <sup>-1</sup> ) | Microporous surface area (m <sup>2</sup> g <sup>-1</sup> ) | Micropore volume (cm <sup>3</sup> g <sup>-1</sup> ) | Mesopore volume (cm <sup>3</sup> g <sup>-1</sup> ) | Total pore volume (cm <sup>3</sup> g <sup>-1</sup> ) |
|---------------------------------------------------------|------------------------------------------------------------|-----------------------------------------------------|----------------------------------------------------|------------------------------------------------------|
| 1950                                                    | 1935                                                       | 0.8447                                              | 0.0473                                             | 0.8920                                               |

\*The textural characterization of the AC was based on N<sub>2</sub> adsorption isotherms determined at 77K using a TriStar 3000 analyzer (Micromeritics). The AC samples were de-gassed for 24h at 573K to remove any moisture or adsorbed contaminants.

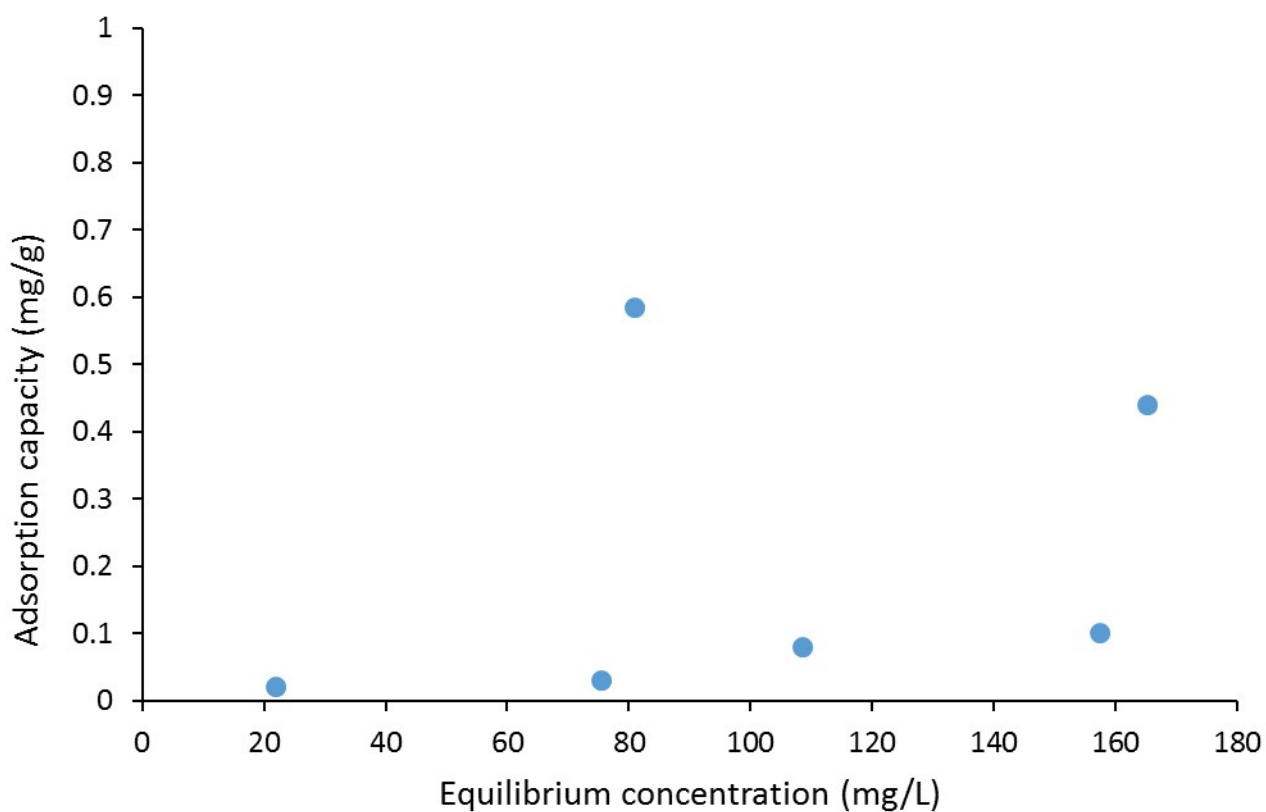

Figure S1. Adsorption capacity data of As(V) on AC at 303K.
